# Supplementary material for: Histone Deacetylase 701 (HDT701) Induces Flowering in Rice by Modulating Expression of OsIDS1
Source: PubMed Central journal article supplement — Mol Cells. 2018 Jul 10;41(7):665–75. doi: 10.14348/molcells.2018.0148 (PMC6078857; doi:10.14348/molcells.2018.0148), 2018-07-10
Supplement: molce-41-7-665-suppl.pdf [file molce-41-7-665-suppl.pdf]

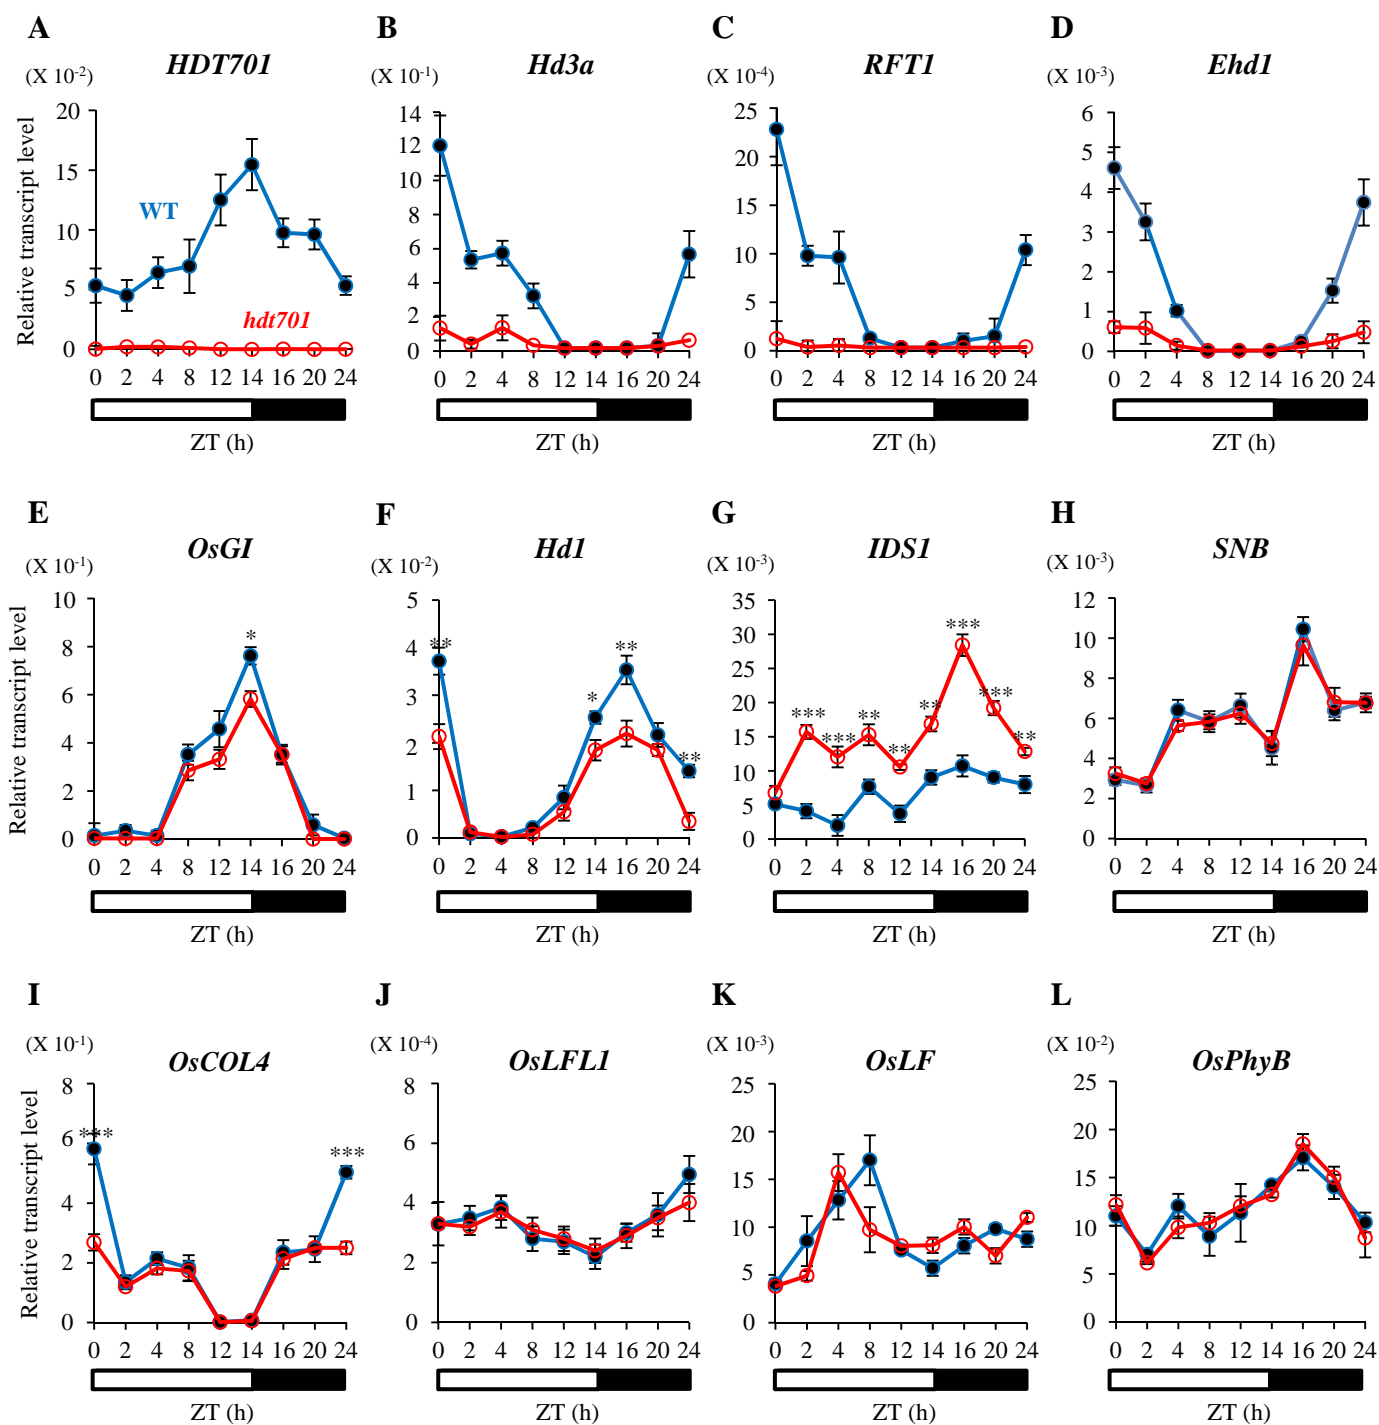

**Supplementary Fig. S1.** Independent biological replicates of diurnal expression patterns of floral regulators in leaf blades of WT and *hdt701-1* plants at 49 DAG under LD. Quantitative RT-PCR analyses of *HDT701* (A), *Hd3a* (B), *RFT1* (C), *Ehd1* (D), *OsGI* (E), *Hd1* (F), *IDS1* (G), *SNB* (H), *OsCOL4* (I), *OsLFL1* (J), *OsLF* (K) and *OsPhyB* (L). Close circles, WT; open circles, *hdt701-1*. y-axis, relative transcript level of each gene compared with that of rice *Ubi*. Error bars indicate standard deviations;  $n = 4$  (technical replicates). Levels of significant difference are indicated by \* ( $P < 0.05$ ), \*\* ( $P < 0.01$ ), and \*\*\* ( $P < 0.005$ ).

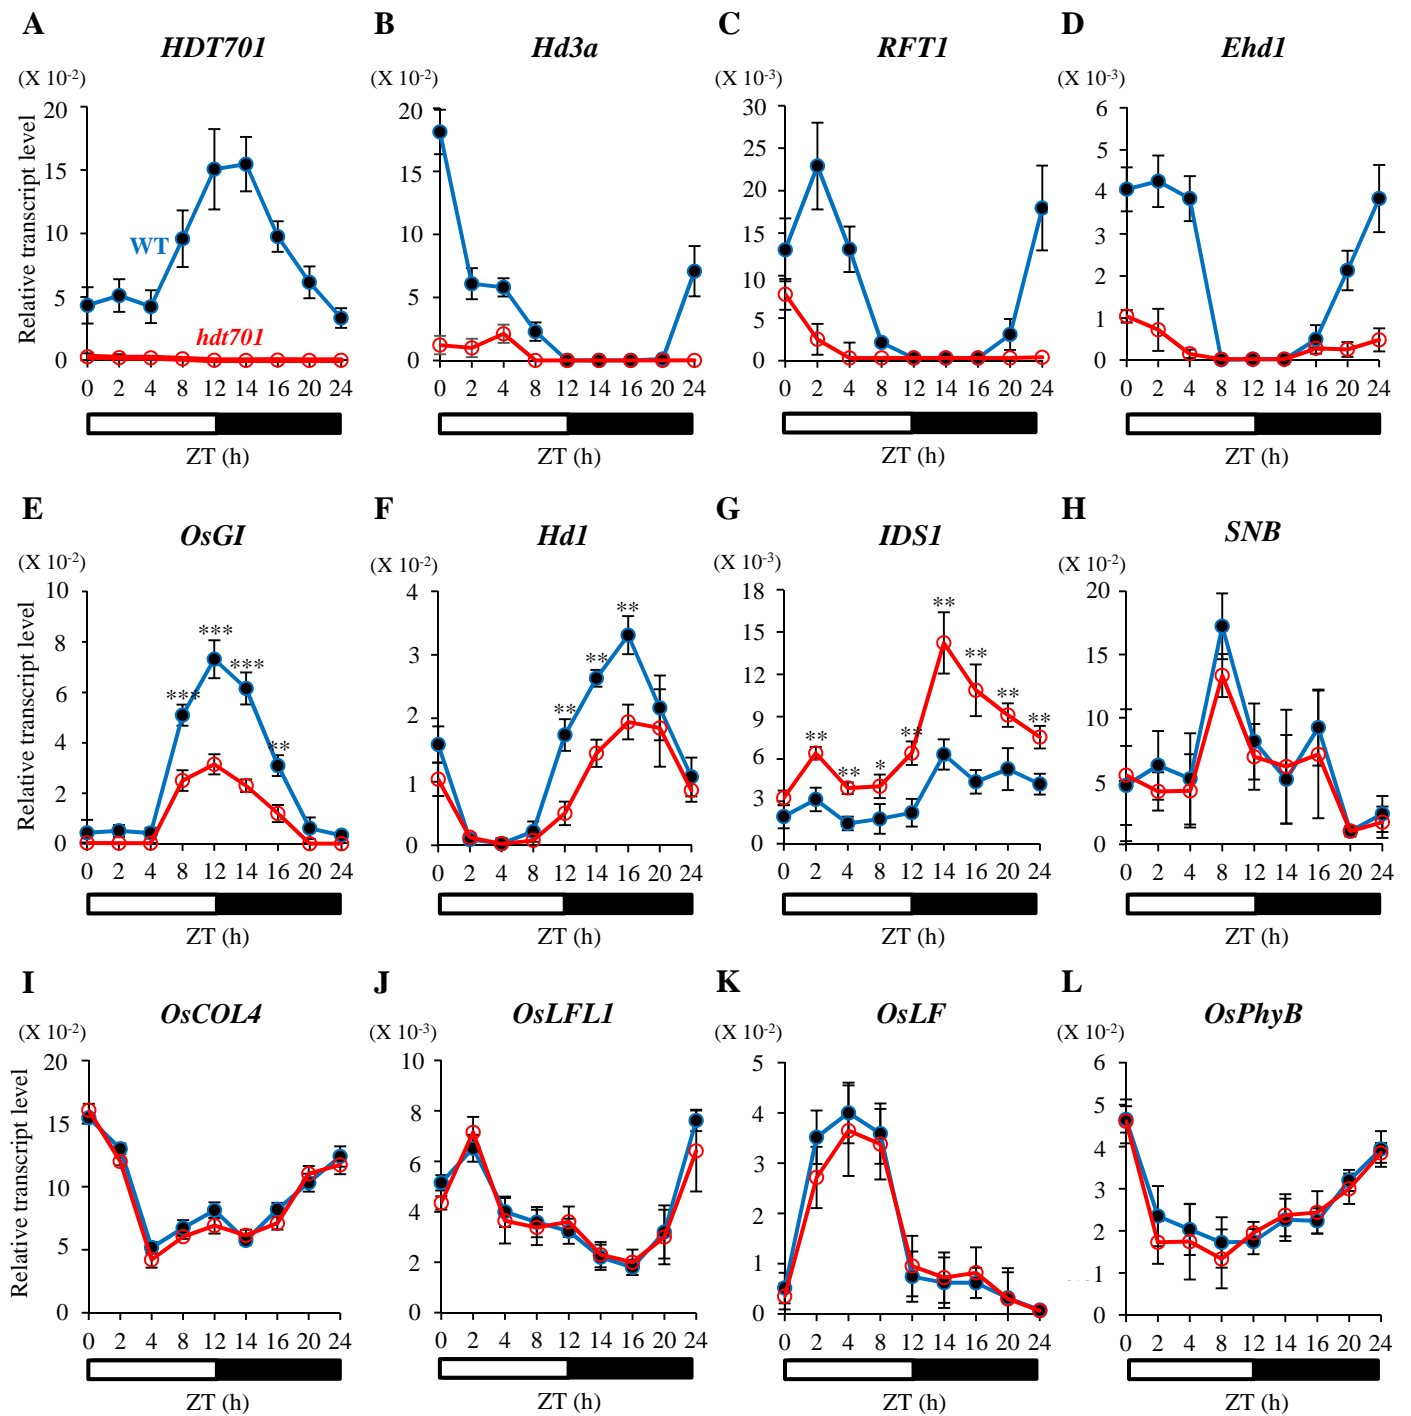

**Supplementary Fig. S2.** Independent biological replicates of diurnal expression patterns of floral regulators in leaf blades of WT and *hdt701-1* plants at 28 DAG under SD. Quantitative RT-PCR analyses of *HDT701* (A), *Hd3a* (B), *RFT1* (C), *Ehd1* (D), *OsGI* (E), *Hd1* (F), *IDS1* (G), *SNB* (H), *OsCOLA* (I), *OsLFL1* (J), *OsLF* (K) and *OsPhyB* (L). Close circles, WT; open circles, *hdt701-1*. y-axis, relative transcript level of each gene compared with that of rice *Ubi*. Error bars indicate standard deviations;  $n = 4$  (technical replicates). Levels of significant difference are indicated by \* ( $P < 0.05$ ), \*\* ( $P < 0.01$ ), and \*\*\* ( $P < 0.005$ ).

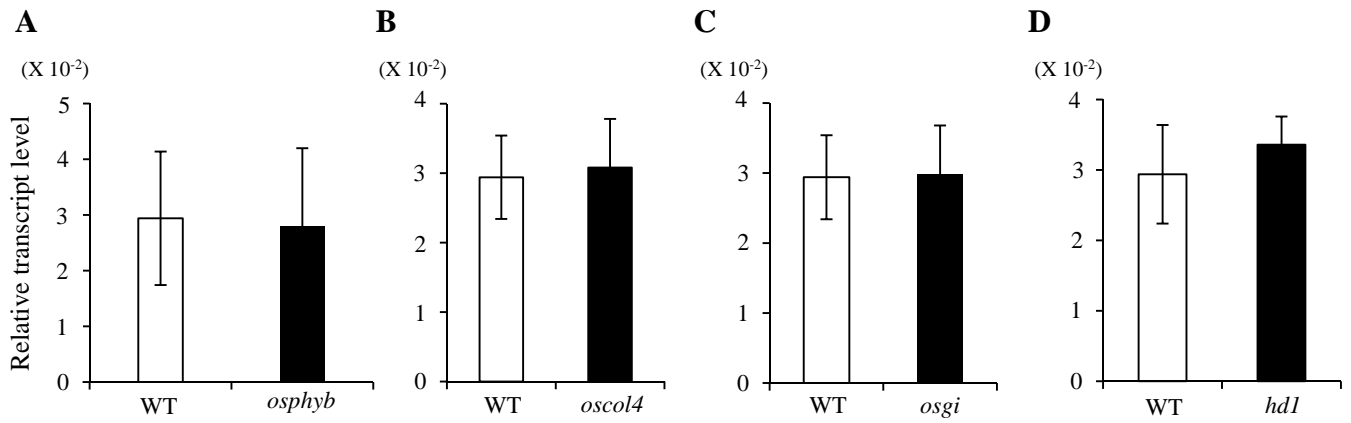

**Supplementary Fig. S3.** Independent biological replicates of expression levels of *HDT701* in *osphyb* (A), *oscol4* (B), *osgi* (C), and *hdl* (D). Total RNAs were isolated from leaf blades at 42 DAG under LD. Error bars display standard deviations;  $n = 4$  (technical replicates).

**Supplementary Table S1.** List of primers used in this study.

| <b>Name</b>                | <b>Sequence (5'-3')</b>         | <b>Purpose</b>    |      |
|----------------------------|---------------------------------|-------------------|------|
| <i>Ubi_RT_F</i>            | TGAAGACCCTGACTGGGAAG            | qRT-PCR           |      |
| <i>Ubi_RT_R</i>            | CACGGTTCAACAACATCCAG            |                   |      |
| <i>HDT701_RT_F</i>         | TAGCTCCGCCTCCCACCT              |                   |      |
| <i>HDT701_RT_R</i>         | CCGGCTGGGAAACTTTGTAG            |                   |      |
| <i>OsGI_RT_F</i>           | TGGAGAAAGGTTGTGGATGC            |                   |      |
| <i>OsGI_RT_R</i>           | GATAGACGGCACTTCAGCAGAT          |                   |      |
| <i>Hd1_RT_F</i>            | AACCAAGATCGGCAGTATGG            |                   |      |
| <i>Hd1_RT_R</i>            | GATTGATTGCTCCAGCAGGT            |                   |      |
| <i>Ehd1_RT_F</i>           | GTTGCCAGTCATCTGCAGAA            |                   |      |
| <i>Ehd1_RT_R</i>           | GGATGTGGATCATGAGACAT            |                   |      |
| <i>Hd3a_RT_F</i>           | AGCCCAAGTGACCCTAACCT            |                   |      |
| <i>Hd3a_RT_R</i>           | GTTGTAGAGCTCGGCGAAGT            |                   |      |
| <i>RFT1_RT_F</i>           | TGACCTAGATTCAAAGTCTAATCCTT      |                   |      |
| <i>RFT1_RT_R</i>           | TGCCGGCCATGTCAAATTAATAAC        |                   |      |
| <i>OsCOL4_RT_F</i>         | ATCCACTCGGCGAACCCGCT            |                   |      |
| <i>OsCOL4_RT_R</i>         | CGCTTCTCCCTGTACCGCAT            |                   |      |
| <i>OsPhyB_RT_F</i>         | ATGGAACAGACACAATGCTT            |                   |      |
| <i>OsPhyB_RT_R</i>         | AGCATAACCATATCAGCTT             |                   |      |
| <i>OsIDS1_RT_F</i>         | CTGGCCTCCAGTTAACTTGT            |                   |      |
| <i>OsIDS1_RT_R</i>         | GGCGCCGGCAGAGAATCCT             |                   |      |
| <i>OsLF_RT_F</i>           | AACCCTAGGGAATGGCAATG            |                   |      |
| <i>OsLF_RT_R</i>           | CGCCCAAATGCAAGTACAGT            |                   |      |
| <i>OsLFL1_RT_F</i>         | CAAAATGCACAACCTCTGGACC          |                   |      |
| <i>OsLFL1_RT_R</i>         | ACCACTTCCCTGTCAGTCTCAC          |                   |      |
| <i>SNB_RT_F</i>            | ATGGAAGGGAAGCTGTTAC             |                   |      |
| <i>SNB_RT_R</i>            | AATGTGGATGCTGGGACATC            |                   |      |
| <i>OsIDS1_P1_F</i>         | CACGATTTCCCTCCCTAACTA           |                   | ChIP |
| <i>OsIDS1_P1_R</i>         | GCCCTGTTTAGTTCCCAAAT            |                   |      |
| <i>OsIDS1_P2_F</i>         | ACACATCCTAAAACGGCTGC            |                   |      |
| <i>OsIDS1_P2_R</i>         | CCATTGCCCTCCACTTCAAC            |                   |      |
| <i>OsIDS1_P3_F</i>         | ACTATCCAACAAGAGGGTAC            |                   |      |
| <i>OsIDS1_P3_R</i>         | GACACATGGCCATTCATATC            |                   |      |
| <i>OsIDS1_P4_F</i>         | CGGAAGCTCTAAAGAACGTT            |                   |      |
| <i>OsIDS1_P4_R</i>         | GACGTTGTCAAGGTGGTTAT            |                   |      |
| <i>OsIDS1_P5_F</i>         | CCTCTTCTTCTTCATCCAAC            |                   |      |
| <i>OsIDS1_P5_R</i>         | AGTGAGTCGTCGTCAGTCGA            |                   |      |
| <i>SNB_P1_F</i>            | GAAACTACACCGGTGGATAT            |                   |      |
| <i>SNB_P1_R</i>            | TGACATGATGTATCTGCAGG            |                   |      |
| <i>SNB_P2_F</i>            | GTTTGCTCCTTTGATATTTATA          |                   |      |
| <i>SNB_P2_R</i>            | TGAAGTCTAACTCAGCTTCTG           |                   |      |
| <i>SNB_P3_F</i>            | GGAATATTATGGAATGGTGGAA          |                   |      |
| <i>SNB_P3_R</i>            | TAAGCTAACGGGCAAACGAT            |                   |      |
| <i>SNB_P4_F</i>            | AGCCAACAATGCTAGCTTAG            |                   |      |
| <i>SNB_P4_R</i>            | TCGACTTATAACACGGTTGG            |                   |      |
| <i>SNB_P5_F</i>            | GCAATGTCGAGTGGAAAATAC           |                   |      |
| <i>SNB_P5_R</i>            | CTTGAAAGAGTTTGATTTTGACC         |                   |      |
| <i>SNB_P6_F</i>            | ACCTGAAGCAGTTTAACTTTGAT         |                   |      |
| <i>SNB_P6_R</i>            | GAGTGTGCTATGCTTTGTTG            |                   |      |
| <i>HDT701_OX_HindIII_F</i> | <u>AAGCTTTAGCTCCGCCTCCCACCT</u> | Transgenic plants |      |
| <i>HDT701_OX_SpeI_R</i>    | <u>ACTAGTCTTGGCGGGGTGCTTGGC</u> |                   |      |
| <i>HDT701_CRISPR_F</i>     | <u>GGCAAAGATCATTCCAGCTCCCA</u>  |                   |      |
| <i>HDT701_CRISPR_R</i>     | <u>AAACTGGGAGCTGGAATGATCTTT</u> |                   |      |
